# Supplementary material for: Songbird dynamics under the sea: acoustic interactions between humpback whales suggest song mediates male interactions
Source: R Soc Open Sci. 2018 Feb 14;5(2):171298. doi: 10.1098/rsos.171298 (PMC5830736; doi:10.1098/rsos.171298)
Supplement: Cholewiak_etal_RSOS171298_S2_SongAnalyses_Summary [file rsos171298supp2.xlsx]

## Sheet: Sheet1
		Switching Rate			Relative evenness
DATE	OUTCOME	Focal Before	Focal During	Singer 2 During	Focal J' Before	Focal J' During	Singer 2 J' During
2005-03-02	SING 2 QUIT	0.1	0.13	N/A	0.88	0.85	N/A
2005-03-07	FOCAL QUIT	0.08	0.15	0.12	0.829	0.91	0.87
2005-03-10	BOTH CONT	0.162	0.164	N/A	0.64	0.84	N/A
2005-03-11	BOTH CONT	0.07	0.11	0.12	0.7	0.81	0.83
2005-03-13	BOTH CONT	0.04	0.11	0.14	0.496	0.78	0.82
2006-03-02	BOTH CONT	0.13	0.15	0.17	0.92	0.88	0.84
2006-03-03	BOTH CONT	0.08	0.09	0.13	0.79	0.85	0.91
2006-03-14	BOTH CONT	0.14	0.19	0.1	0.77	0.93	0.77
2006-03-19	BOTH CONT	0.14	0.14	0.12	0.84	0.83	0.91
2006-03-23	FOCAL QUIT	0.11	N/A	0.13		N/A	0.94
2006-03-30	BOTH CONT	0.16	0.18	0.12	0.78	0.94	0.64
2006-03-31	SING 2 QUIT	0.11	0.12	0.1	0.7	0.54	0.79
